# Supplementary material for: Promoter from Chinese hamster elongation factor-1a gene and Epstein-Barr virus terminal repeats concatemer fragment maintain stable high-level expression of recombinant proteins
Source: PeerJ. 2023 Oct 24;11:e16287. doi: 10.7717/peerj.16287 (PMC10607201; doi:10.7717/peerj.16287)
Supplement: Supplemental Information 3 [file peerj-11-16287-s003.xlsx]

## Sheet: Together
Data of lysis	Days w/o MTX	Cells in lysate	Smp from	Smp ID	GFP by fluor, mg/mL	%RSD	Total prot, mg/mL	%RSD	GFP/total, %	SD together, %
	0	10 MLN	2020-03-29	Tr1 200 nM	0.0610116	0.0183596	7.8175	0.0411556	0.00780449	0.000351709	1st biol rep
	0	10 MLN	2020-03-29	Tr2 200 nM	0.0461924	0.0189202	6.7645	0.0312551	0.00682866	0.000249489
	0	10 MLN	2020-03-29	Tr3 200 nM	0.0567542	0.0376561	7.97	0.0067428	0.00712098	0.000272413
	0	10 MLN	2020-03-29	Tr2(-)EBVTR 200 nM	0.0504824	0.0101868	8.8965	0.0127965	0.00567441	9.28113e-05
	0	10 MLN	2020-03-29	ARD 200 nM	0.0718329	0.0184385	7.903	0.0180736	0.00908932	0.000234679
	0	10 MLN	2020-03-29	p1.1 200 nM	0.0420291	0.000514903	7.63208	0.0309603	0.0055069	0.000170519
	0	10 MLN	2020-03-29	Tr1 200 nM	0.0573247	0.0242188	9.23187	0.0119678	0.00620943	0.000167744	2nd biol rep
	0	10 MLN	2020-03-29	Tr2 200 nM	0.0553185	0.00427904	8.41562	0.0276226	0.00657331	0.000183738
	0	10 MLN	2020-03-29	Tr3 200 nM	0.0512763	0.0236644	8.11875	0.0224271	0.00631578	0.000205916
	0	10 MLN	2020-03-29	Tr2(-)EBVTR 200 nM	0.054494	0.00215338	8.61187	0.0750265	0.00632778	0.000474946
	0	10 MLN	2020-03-29	ARD 200 nM	0.0734275	0.000872161	9.4875	0.0188189	0.0077394	0.000145803
	0	10 MLN	2020-03-29	p1.1 200 nM	0.0397423	0.033942	7.61792	0.00348081	0.00521695	0.000178002
	0	5 MLN	2020-04-20	Tr1 2mkM	0.304236	0.00196098	7.763	0.0309695	0.0391905	0.00121614	1st biol rep
	0	5 MLN	2020-04-20	Tr2 2mkM	0.34474	0.0238215	8.326	0.0288754	0.0414052	0.00154993
	0	5 MLN	2020-04-20	Tr3 2mkM	0.373962	0.0173573	7.6565	0.00951244	0.0488424	0.000966736
	0	5 MLN	2020-04-20	Tr2(-)EBVTR 2mkM	0.394364	0.0236438	8.4195	0.0365332	0.0468394	0.00203829
	0	5 MLN	2020-04-20	ARD 2mkM	0.316518	0.0320204	8.1925	0.0361645	0.0386351	0.00186619
	0	5 MLN	2020-04-20	p1.1 2mkM	0.213386	0.000907299	6.58833	0.0050086	0.0323885	0.000164861
	0	5 MLN	2020-04-20	Tr1 2mkM	0.337567	0.0129683	8.77313	0.0242805	0.0384774	0.00105916	2nd biol rep
	0	5 MLN	2020-04-20	Tr2 2mkM	0.36353	0.00578938	9.5575	0.024045	0.0380361	0.000940713
	0	5 MLN	2020-04-20	Tr3 2mkM	0.398771	0.00194953	9.35542	0.00176359	0.0426246	0.000112054
	0	5 MLN	2020-04-20	Tr2(-)EBVTR 2mkM	0.40887	0.0089587	10.0981	0.0207445	0.0404897	0.000914917
	0	5 MLN	2020-04-20	ARD 2mkM	0.339647	0.00496712	9.36125	0.000944194	0.0362823	0.000183445
	0	5 MLN	2020-04-20	p1.1 2mkM	0.267409	0.00496357	8.19558	0.0294355	0.0326284	0.000973993
	9	5 MLN	2020-05-29	Tr1 2mkM stab	0.258287	0.000595854	7.816	0.0327498	0.033046	0.00108243	1st biol rep
	9	5 MLN	2020-05-29	Tr2 2mkM stab	0.283537	0.0194721	8.421	0.00554198	0.0336703	0.000681668
	9	5 MLN	2020-05-29	Tr3 2mkM stab	0.298198	0.0150824	7.95	0.00800498	0.0375092	0.000640473
	9	5 MLN	2020-05-29	Tr2(-)EBVTR 2mkM stab	0.253838	0.0270918	8.0155	0.00114683	0.0316684	0.000858723
	9	5 MLN	2020-05-29	ARD 2mkM stab	0.258317	0.0215269	7.605	0.0520683	0.0339667	0.00191378
	9	5 MLN	2020-05-29	p1.1 2mkM stab					#DIV/0!	#DIV/0!
	9	5 MLN	2020-05-29	Tr1 2mkM stab	0.256493	0.00427956	9.39937	0.0247316	0.0272883	0.000684913	2nd biol rep
	9	5 MLN	2020-05-29	Tr2 2mkM stab	0.289011	0.00615666	9.6775	0.0558963	0.0298643	0.0016794
	9	5 MLN	2020-05-29	Tr3 2mkM stab	0.311448	0.00156737	9.77437	0.0302936	0.0318638	0.000966559
	9	5 MLN	2020-05-29	Tr2(-)EBVTR 2mkM stab	0.267492	0.0031696	9.38	0.00565384	0.0285173	0.00018484
	9	5 MLN	2020-05-29	ARD 2mkM stab	0.267959	0.00175233	9.48062	0.00270368	0.0282638	9.10629e-05
	9	5 MLN	2020-05-29	p1.1 2mkM stab					#DIV/0!	#DIV/0!
	18	5 MLN	2020-06-07	Tr1 2mkM stab	0.214962	0.0131769	7.3035	0.0310784	0.0294328	0.000993546	1st biol rep
	18	5 MLN	2020-06-07	Tr2 2mkM stab	0.244613	0.0162141	7.855	0.0235852	0.0311411	0.000891289
	18	5 MLN	2020-06-07	Tr3 2mkM stab	0.236917	0.0065944	7.1565	0.0176863	0.0331051	0.000624882
	18	5 MLN	2020-06-07	Tr2(-)EBVTR 2mkM stab	0.223294	0.00645585	8.2325	0.0114237	0.0271235	0.000355905
	18	5 MLN	2020-06-07	ARD 2mkM stab	0.213595	0.0170325	7.693	0.010846	0.0277648	0.000560646
	18	5 MLN	2020-06-07	p1.1 2mkM stab					#DIV/0!	#DIV/0!
	18	5 MLN	2020-06-07	Tr1 2mkM stab	0.230345	0.00393074	9.56812	0.0298381	0.0240743	0.000724535	2nd biol rep
	18	5 MLN	2020-06-07	Tr2 2mkM stab	0.248701	0.00161888	9.64875	0.0560629	0.0257755	0.00144565
	18	5 MLN	2020-06-07	Tr3 2mkM stab	0.237894	0.00400141	9.16562	0.0242051	0.025955	0.000636769
	18	5 MLN	2020-06-07	Tr2(-)EBVTR 2mkM stab	0.220292	0.013108	8.86562	0.00089728	0.0248479	0.000326469
	18	5 MLN	2020-06-07	ARD 2mkM stab	0.212748	0.0251136	8.33437	0.0336187	0.0255266	0.00107118
	18	5 MLN	2020-06-07	p1.1 2mkM stab					#DIV/0!	#DIV/0!
	27	5 MLN	2020-06-16	Tr1 2mkM	0.229398	0.0192913	8.68125	0.00671981	0.0264246	0.000539806	1st biol rep
	27	5 MLN	2020-06-16	Tr2 2mkM	0.208872	0.00208005	8.73937	0.0142605	0.0239001	0.000344433
	27	5 MLN	2020-06-16	Tr3 2mkM	0.1523	0.017707	7.71	0.0107763	0.0197536	0.000409459
	27	5 MLN	2020-06-16	Tr2(-)EBVTR 2mkM	0.181066	0.00895085	8.13625	0.0210752	0.0222543	0.000509561
	27	5 MLN	2020-06-16	ARD 2mkM	0.206842	0.00484604	8.62042	0.0138079	0.0239944	0.000351124
	27	5 MLN	2020-06-16	p1.1 2mkM					#DIV/0!	#DIV/0!
	27	5 MLN	2020-06-16	Tr1 2mkM	0.198358	0.017403	9	0.007	0.0220398	0.000413424	2nd biol rep
	27	5 MLN	2020-06-16	Tr2 2mkM	0.208748	0.000707577	8.84	0.005	0.0236141	0.000119247
	27	5 MLN	2020-06-16	Tr3 2mkM	0.175163	0.0161597	8.16	0.007	0.0214661	0.000378033
	27	5 MLN	2020-06-16	Tr2(-)EBVTR 2mkM	0.183306	0.00226633	8.88	0.012	0.0206426	0.00025209
	27	5 MLN	2020-06-16	ARD 2mkM	0.197834	0.00232703	8.88	0.006	0.0222786	0.000143373
	27	5 MLN	2020-06-16	p1.1 2mkM					#DIV/0!	#DIV/0!
	36	5 MLN	2020-06-25	Tr1 2mkM stab	0.209224	0.00637702	8.5625	0.004542	0.024435	0.000191306	1st biol rep		from here p1.1-2
	36	5 MLN	2020-06-25	Tr2 2mkM stab	0.215925	0.00144165	9.16562	0.0411776	0.0235581	0.00097066
	36	5 MLN	2020-06-25	Tr3 2mkM stab	0.214081	0.00124714	9.9125	0.0048151	0.0215971	0.000107424
	36	5 MLN	2020-06-25	Tr2(-)EBVTR 2mkM stab	0.207863	0.0121817	9.17063	0.0230353	0.0226662	0.000590636
	36	5 MLN	2020-06-25	ARD 2mkM stab	0.241463	0.0272935	9.78563	0.00605175	0.0246753	0.000689831
	36	5 MLN	2020-06-25	p1.1 2mkM stab	0.297501	0.0078015	10.1575	0.000348071	0.0292888	0.000228724
	36	5 MLN	2020-06-25	Tr1 2mkM stab	0.20349	0.0037503	8.41	0.033	0.0241962	0.000803615	2nd biol rep
	36	5 MLN	2020-06-25	Tr2 2mkM stab	0.212451	0.00174983	9.22	0.005	0.0230424	0.000122064
	36	5 MLN	2020-06-25	Tr3 2mkM stab	0.206891	0.00536634	10.06	0.007	0.0205657	0.000181396
	36	5 MLN	2020-06-25	Tr2(-)EBVTR 2mkM stab	0.156071	0.00722519	8.48	0.038	0.0184046	0.000711903
	36	5 MLN	2020-06-25	ARD 2mkM stab	0.234907	0.0106326	10.21	0.029	0.0230076	0.000710652
	36	5 MLN	2020-06-25	p1.1 2mkM stab	0.304766	0.00945097	10.45	0.028	0.0291642	0.000861862
	45	5 MLN	2020-07-04	Tr1 2mkM stab	0.212201	0.00243541	7.77188	0.0810884	0.0273037	0.00221501	1st biol rep
	45	5 MLN	2020-07-04	Tr2 2mkM stab	0.186476	0.000923888	7.77125	0.00113738	0.0239957	3.51616e-05
	45	5 MLN	2020-07-04	Tr3 2mkM stab	0.154842	0.00827891	8.0925	0.0135436	0.019134	0.000303725
	45	5 MLN	2020-07-04	Tr2(-)EBVTR 2mkM stab	0.190609	0.00455353	8.65312	0.034219	0.0220277	0.00076041
	45	5 MLN	2020-07-04	ARD 2mkM stab	0.218063	0.00975475	9.31	0.00284817	0.0234225	0.00023802
	45	5 MLN	2020-07-04	p1.1 2mkM stab	0.17916	0.0433344	8.0325	0.0094633	0.0223043	0.000989323
	45	5 MLN	2020-07-04	Tr1 2mkM stab	0.217339	0.0089032	9.42	0.021	0.0230721	0.000526259	2nd biol rep
	45	5 MLN	2020-07-04	Tr2 2mkM stab	0.181066	0.0117596	8.46	0.015	0.0214026	0.000407936
	45	5 MLN	2020-07-04	Tr3 2mkM stab	0.159411	0.00264993	8.75	0.019	0.0182184	0.0003495
	45	5 MLN	2020-07-04	Tr2(-)EBVTR 2mkM stab	0.19103	0.00517001	9.46	0.019	0.0201934	0.000397626
	45	5 MLN	2020-07-04	ARD 2mkM stab	0.203223	0.0106668	9.18	0.017	0.0221376	0.000444289
	45	5 MLN	2020-07-04	p1.1 2mkM stab	0.211493	0.00380917	9.78	0.014	0.0216251	0.000313757
	54	5 MLN	2020-07-13	Tr1 2mkM stab	0.232492	0.00675171	9.49	0.019	0.0244987	0.000493991	1st biol rep
	54	5 MLN	2020-07-13	Tr2 2mkM stab	0.217207	0.00594677	8.91	0.008	0.0243779	0.000243002
	54	5 MLN	2020-07-13	Tr3 2mkM stab	0.165614	0.0234341	9.32	0.021	0.0177697	0.000559155
	54	5 MLN	2020-07-13	Tr2(-)EBVTR 2mkM stab	0.167596	0.00608079	8.01	0.001	0.0209234	0.00012894
	54	5 MLN	2020-07-13	ARD 2mkM stab	0.223318	0.0152001	9.44	0.027	0.0236566	0.00073299
	54	5 MLN	2020-07-13	p1.1 2mkM stab	0.152829	0.00718345	7.92	0.034	0.0192965	0.000670566
	54	5 MLN	2020-07-13	Tr1 2mkM stab	0.21644	0.0237506	8.1	0.008	0.026721	0.000669675	2nd biol rep
	54	5 MLN	2020-07-13	Tr2 2mkM stab	0.212758	0.00330584	8.36	0.003	0.0254496	0.00011361
	54	5 MLN	2020-07-13	Tr3 2mkM stab	0.166115	0.0164658	8.53	0.004	0.0194742	0.000329985
	54	5 MLN	2020-07-13	Tr2(-)EBVTR 2mkM stab	0.169942	0.00352232	8.36	0.008	0.020328	0.000177689
	54	5 MLN	2020-07-13	ARD 2mkM stab	0.223557	0.00641151	8.85	0.002	0.0252606	0.000169656
	54	5 MLN	2020-07-13	p1.1 2mkM stab	0.174624	0.00200601	8.47	0.057	0.0206167	0.00117588
	63	5 MLN	2020-07-22	Tr1 2mkM stab	0.253042	0.0128715	10.85	0.02	0.0233219	0.000554686	1st biol rep
	63	5 MLN	2020-07-22	Tr2 2mkM stab	0.200194	0.0222287	9.34	0.014	0.0214341	0.000563074
	63	5 MLN	2020-07-22	Tr3 2mkM stab	0.16144	0.0141205	9.58	0.03	0.0168518	0.000558755
	63	5 MLN	2020-07-22	Tr2(-)EBVTR 2mkM stab	0.190388	0.0305261	9.86	0.05	0.0193091	0.00113116
	63	5 MLN	2020-07-22	ARD 2mkM stab	0.219733	0.0198499	9.74	0.016	0.0225599	0.000575174
	63	5 MLN	2020-07-22	p1.1 2mkM stab	0.155425	0.0181119	9.89	0.005	0.0157154	0.000295282
	63	5 MLN	2020-07-22	Tr1 2mkM stab	0.245214	0.0048742	9.87	0.025	0.0248443	0.000632803	2nd biol rep
	63	5 MLN	2020-07-22	Tr2 2mkM stab	0.198932	0.00348018	9.76	0.004	0.0203824	0.000108068
	63	5 MLN	2020-07-22	Tr3 2mkM stab	0.160653	0.016444	9.95	0.006	0.016146	0.000282627
	63	5 MLN	2020-07-22	Tr2(-)EBVTR 2mkM stab	0.187522	0.0175387	10.37	0.049	0.0180831	0.000941123
	63	5 MLN	2020-07-22	ARD 2mkM stab	0.179573	0.0135511	8.03	0.025	0.0223627	0.000635917
	63	5 MLN	2020-07-22	p1.1 2mkM stab	0.151837	0.021972	7	0.065	0.021691	0.00148829
		5 MLN	2020-07-31	p1.1-2 2mkM stab	0.127018	0.0195936	7.49375	0.0129744	0.0169499	0.00039832
		5 MLN	2020-07-31	p1.1-2 2mkM stab	0.129497	0.0151224	7.38875	0.0844557	0.0175263	0.00150373
		5 MLN	2020-08-09	p1.1-2 2mkM stab	0.110167	0.0246136	6.5675	0.0253019	0.0167745	0.000592123
		5 MLN	2020-08-09	p1.1-2 2mkM stab	0.196716	0.0349504	9.63312	0.0125704	0.0204208	0.000758473
		5 MLN	2020-08-17	p1.1-2 2mkM stab	0.0605149	0.0156329	4.18938	0.0213092	0.0144448	0.000381757
		5 MLN	2020-08-17	p1.1-2 2mkM stab	0.120224	0.0174332	7.16563	0.0136919	0.0167778	0.000371917

## Sheet: Diagram all 6
																		p1.1-Tr1-eGFP 2mkM stability								p1.1-Tr2-eGFP 2mkM stability								p1.1-Tr3-eGFP 2mkM stability								p1.1-Tr2(-)EBVTR-eGFP 2mkM stability
	200 nM MTX										Amplification rate						Days in culture w/o MTX	p1.1-Tr1								p1.1-Tr2								p1.1-Tr3								p1.1-Tr2(-)EBV
	Biol Rep 1		Biol Rep 2		Mean of 2 biol reps			P-v vs Tr2	Significant				Unpaired t test results					Biol Rep 1		Biol Rep 2		Mean of 2 biol reps				Biol Rep 1		Biol Rep 2		Mean of 2 biol reps				Biol Rep 1		Biol Rep 2		Mean of 2 biol reps				Biol Rep 1		Biol Rep 2		Mean of 2 biol reps
	GFP/total protein, %	SD	GFP/total protein, %	SD	GFP/total protein, %	SD geom	SD ?						P-v vs Tr2	Significant				GFP/total protein, %	SD	GFP/total protein, %	SD	GFP/total protein, %	SD	% from initial	SD	GFP/total protein, %	SD	GFP/total protein, %	SD	GFP/total protein, %	SD	% from initial	SD	GFP/total protein, %	SD	GFP/total protein, %	SD	GFP/total protein, %	SD	% from initial	SD	GFP/total protein, %	SD	GFP/total protein, %	SD	GFP/total protein, %	SD	% from initial	SD
p1.1	0.0055069	0.000170519	0.00521695	0.000178002	0.00536193	0.000247055	0.000205026	0.0364	statistically significant.		6.06283	0.33428	0.7499	not statistically significant.			0	0.0391905	0.00121614	0.0384774	0.00105916	0.038834	0.00161087	1	0.058663	0.0414052	0.00154993	0.0380361	0.000940713	0.0397207	0.00178209	1	0.0634496	0.0488424	0.000966736	0.0426246	0.000112054	0.0457335	0.000913151	1	0.0282373	0.0468394	0.00203829	0.0404897	0.000914917	0.0436645	0.00214103	1	0.069344
p1.1-D	0.00908932	0.000234679	0.0077394	0.000145803	0.00841436	0.000268936	0.000954538	0.0298	statistically significant.		4.45176	0.258826	0.0451	statistically significant.			9	0.033046	0.00108243	0.0272883	0.000684913	0.0301672	0.00124487	0.776823	0.0454528	0.0336703	0.000681668	0.0298643	0.0016794	0.0317673	0.00189866	0.799767	0.0597694	0.0375092	0.000640473	0.0318638	0.000966559	0.0346865	0.00120743	0.758448	0.0304363	0.0316684	0.000858723	0.0285173	0.00018484	0.0300929	0.000838988	0.689183	0.0388738
p1.1-Tr1	0.00780449	0.000351709	0.00620943	0.000167744	0.00700696	0.000368158	0.00112788	0.4855	not statistically significant.		5.5422	0.371009	0.4076	not statistically significant.			18	0.0294328	0.000993546	0.0240743	0.000724535	0.0267535	0.00120992	0.68892	0.0422771	0.0311411	0.000891289	0.0257755	0.00144565	0.0284583	0.00179193	0.71646	0.0553938	0.0331051	0.000624882	0.025955	0.000636769	0.02953	0.000914092	0.645698	0.0237847	0.0271235	0.000355905	0.0248479	0.000326469	0.0259857	0.000482526	0.595122	0.0312033
p1.1-Tr2	0.00682866	0.000249489	0.00657331	0.000183738	0.00670098	0.000308258	0.000180555				5.92759	0.380895					27	0.0264246	0.000539806	0.0220398	0.000413424	0.0242322	0.000672056	0.623994	0.0311363	0.0239001	0.000344433	0.0236141	0.000119247	0.0237571	0.000362783	0.598104	0.0283461	0.0197536	0.000409459	0.0214661	0.000378033	0.0206098	0.000560573	0.450651	0.0152055	0.0222543	0.000509561	0.0206426	0.00025209	0.0214484	0.000556594	0.491209	0.0272509
p1.1-Tr3	0.00712098	0.000272413	0.00631578	0.000205916	0.00671838	0.00033769	0.000569357	0.9559	not statistically significant.		6.80722	0.368163	0.1435	not statistically significant.			36	0.024435	0.000191306	0.0241962	0.000803615	0.0243156	0.000829714	0.626142	0.0336317	0.0235581	0.00097066	0.0230424	0.000122064	0.0233002	0.000967938	0.586603	0.0358676	0.0215971	0.000107424	0.0205657	0.000181396	0.0210814	0.000213473	0.460962	0.0103199	0.0226662	0.000590636	0.0184046	0.000711903	0.0205354	0.000957756	0.470299	0.0318261
p1.1-Tr2(-)EBV	0.00567441	9.28113e-05	0.00632778	0.000474946	0.00600109	0.000460997	0.000462	0.2317	not statistically significant.		7.2761	0.663101	0.1290	not statistically significant.			45	0.0273037	0.00221501	0.0230721	0.000526259	0.0251879	0.0021226	0.648604	0.0609212	0.0239957	3.51616e-05	0.0214026	0.000407936	0.0226991	0.000433925	0.571469	0.0278697	0.019134	0.000303725	0.0182184	0.0003495	0.0186762	0.000465031	0.40837	0.0130338	0.0220277	0.00076041	0.0201934	0.000397626	0.0211106	0.00083897	0.483472	0.0305151
																	54	0.0244987	0.000493991	0.026721	0.000669675	0.0256098	0.000823776	0.659469	0.0346165	0.0243779	0.000243002	0.0254496	0.00011361	0.0249137	0.00027211	0.627223	0.0289626	0.0177697	0.000559155	0.0194742	0.000329985	0.018622	0.000665531	0.407184	0.0166695	0.0209234	0.00012894	0.020328	0.000177689	0.0206257	0.000220592	0.472368	0.0237064
													Unpaired t test results				63	0.0233219	0.000554686	0.0248443	0.000632803	0.0240831	0.000839265	0.620155	0.0335979	0.0214341	0.000563074	0.0203824	0.000108068	0.0209082	0.000560335	0.526381	0.0275089	0.0168518	0.000558755	0.016146	0.000282627	0.0164989	0.000618608	0.360762	0.0153248	0.0193091	0.00113116	0.0180831	0.000941123	0.0186961	0.00146505	0.428176	0.0395796
													P-v vs p11	Significant
	2000 nM MTX										6.06283	0.33428
	Biol Rep 1		Biol Rep 2		Mean of 2 biol reps			P-v vs Tr2	Significant		4.45176	0.258826	0.0324	statistically significant.
	GFP/total protein, %	SD	GFP/total protein, %	SD	GFP/total protein, %	SD geom	SD ?				5.5422	0.371009	0.2762	not statistically significant.
p1.1	0.0323885	0.000164861	0.0326284	0.000973993	0.0325085	0.00098442	0.000169613	0.0385	statistically significant		5.92759	0.380895	0.7499	not statistically significant.
p1.1-D	0.0386351	0.00186619	0.0362823	0.000183445	0.0374587	0.00181925	0.00166371	0.3461	not statistically significant.		6.80722	0.368163	0.1658	not statistically significant.
p1.1-Tr1	0.0391905	0.00121614	0.0384774	0.00105916	0.038834	0.00161087	0.000504242	0.6499	not statistically significant.		7.2761	0.663101	0.1443	not statistically significant.
p1.1-Tr2	0.0414052	0.00154993	0.0380361	0.000940713	0.0397207	0.00178209	0.00238234																																						Unpaired t test results https://www.graphpad.com/quickcalcs/ttest2/
p1.1-Tr3	0.0488424	0.000966736	0.0426246	0.000112054	0.0457335	0.000913151	0.00439667	0.0519	not quite statistically significant.																																For day 63				P-v vs p1.1(2)	Significant
p1.1-Tr2(-)EBV	0.0468394	0.00203829	0.0404897	0.000914917	0.0436645	0.00214103	0.00448987	0.1775	not statistically significant.																																GFP/total protein, %	SD	% from initial	SD
																																								Tr1	0.0240831	0.000839265	0.620155	0.0335979
																																								Tr2	0.0209082	0.000560335	0.526381	0.0275089
																																								Tr3	0.0164989	0.000618608	0.360762	0.0153248
											0.00203086	0.000729778			0.0220588	0.000925041																								Tr2(-)EBVTR	0.0186961	0.00146505	0.428176	0.0395796
											0.00276063				0.0291642	0.000861862																								ARD	0.0224613	0.000857848	0.599628	0.0370481
											0.0525417				0.0216251	0.000313757																								p1.1	0.0156113	0.000538501	0.480223	0.0220425
											0.000368158
																												0.0222786	0.000143373
																												0.0230076	0.000710652
																												0.0221376	0.000444289
																					Что говорит проточник: день 0 после отмены метотрексата (зеленые кривые) против дня 57
[truncated: 16 more columns]

## Sheet: eGFP expression
														p1.1-Tr1-eGFP 2000 nM stability								p1.1-Tr2-eGFP 2000 nM stability								p1.1-Tr3-eGFP 2000 nM stability								p1.1-Tr2(-)EBVTR-eGFP 2000 nM stability								p1.1-D-eGFP 2000 nM stability
	200 nM MTX												Days in culture w/o MTX	p1.1-Tr1								p1.1-Tr2								p1.1-Tr3								p1.1-Tr2(-)EBV								p1.1-D
	Biol Rep 1		Biol Rep 2		Mean of 2 biol reps									Biol Rep 1		Biol Rep 2		Mean of 2 biol reps				Biol Rep 1		Biol Rep 2		Mean of 2 biol reps				Biol Rep 1		Biol Rep 2		Mean of 2 biol reps				Biol Rep 1		Biol Rep 2		Mean of 2 biol reps				Biol Rep 1		Biol Rep 2
	GFP/total protein, %	SD	GFP/total protein, %	SD	GFP/total protein, %	SD geom	P-value vs Tr2 (unpaired t-test)							GFP/total protein, %	SD	GFP/total protein, %	SD	GFP/total protein, %	SD	% from initial	SD	GFP/total protein, %	SD	GFP/total protein, %	SD	GFP/total protein, %	SD	% from initial	SD	GFP/total protein, %	SD	GFP/total protein, %	SD	GFP/total protein, %	SD	% from initial	SD	GFP/total protein, %	SD	GFP/total protein, %	SD	GFP/total protein, %	SD	% from initial	SD	GFP/total protein, %	SD	GFP/total protein, %	SD
p1.1	0.0055069	0.000170519	0.00521695	0.000178002	0.00536193	0.000247055	0.0364						0	0.0391905	0.00121614	0.0384774	0.00105916	0.038834	0.00161087	1	0.058663	0.0414052	0.00154993	0.0380361	0.000940713	0.0397207	0.00178209	1	0.0634496	0.0488424	0.000966736	0.0426246	0.000112054	0.0457335	0.000913151	1	0.0282373	0.0468394	0.00203829	0.0404897	0.000914917	0.0436645	0.00214103	1	0.069344	0.0386351	0.00186619	0.0362823	0.000183445
p1.1-D	0.00908932	0.000234679	0.0077394	0.000145803	0.00841436	0.000268936	0.0298						9	0.033046	0.00108243	0.0272883	0.000684913	0.0301672	0.00124487	0.776823	0.0454528	0.0336703	0.000681668	0.0298643	0.0016794	0.0317673	0.00189866	0.799767	0.0597694	0.0375092	0.000640473	0.0318638	0.000966559	0.0346865	0.00120743	0.758448	0.0304363	0.0316684	0.000858723	0.0285173	0.00018484	0.0300929	0.000838988	0.689183	0.0388738	0.0339667	0.00191378	0.0282638	9.10629e-05
p1.1-Tr1	0.00780449	0.000351709	0.00620943	0.000167744	0.00700696	0.000368158	0.4855						18	0.0294328	0.000993546	0.0240743	0.000724535	0.0267535	0.00120992	0.68892	0.0422771	0.0311411	0.000891289	0.0257755	0.00144565	0.0284583	0.00179193	0.71646	0.0553938	0.0331051	0.000624882	0.025955	0.000636769	0.02953	0.000914092	0.645698	0.0237847	0.0271235	0.000355905	0.0248479	0.000326469	0.0259857	0.000482526	0.595122	0.0312033	0.0277648	0.000560646	0.0255266	0.00107118
p1.1-Tr2	0.00682866	0.000249489	0.00657331	0.000183738	0.00670098	0.000308258							27	0.0264246	0.000539806	0.0220398	0.000413424	0.0242322	0.000672056	0.623994	0.0311363	0.0239001	0.000344433	0.0236141	0.000119247	0.0237571	0.000362783	0.598104	0.0283461	0.0197536	0.000409459	0.0214661	0.000378033	0.0206098	0.000560573	0.450651	0.0152055	0.0222543	0.000509561	0.0206426	0.00025209	0.0214484	0.000556594	0.491209	0.0272509	0.0239944	0.000351124	0.0222786	0.000143373
p1.1-Tr3	0.00712098	0.000272413	0.00631578	0.000205916	0.00671838	0.00033769	0.9559						36	0.024435	0.000191306	0.0241962	0.000803615	0.0243156	0.000829714	0.626142	0.0336317	0.0235581	0.00097066	0.0230424	0.000122064	0.0233002	0.000967938	0.586603	0.0358676	0.0215971	0.000107424	0.0205657	0.000181396	0.0210814	0.000213473	0.460962	0.0103199	0.0226662	0.000590636	0.0184046	0.000711903	0.0205354	0.000957756	0.470299	0.0318261	0.0246753	0.000689831	0.0230076	0.000710652
													45	0.0273037	0.00221501	0.0230721	0.000526259	0.0251879	0.0021226	0.648604	0.0609212	0.0239957	3.51616e-05	0.0214026	0.000407936	0.0226991	0.000433925	0.571469	0.0278697	0.019134	0.000303725	0.0182184	0.0003495	0.0186762	0.000465031	0.40837	0.0130338	0.0220277	0.00076041	0.0201934	0.000397626	0.0211106	0.00083897	0.483472	0.0305151	0.0234225	0.00023802	0.0221376	0.000444289
													54	0.0244987	0.000493991	0.026721	0.000669675	0.0256098	0.000823776	0.659469	0.0346165	0.0243779	0.000243002	0.0254496	0.00011361	0.0249137	0.00027211	0.627223	0.0289626	0.0177697	0.000559155	0.0194742	0.000329985	0.018622	0.000665531	0.407184	0.0166695	0.0209234	0.00012894	0.020328	0.000177689	0.0206257	0.000220592	0.472368	0.0237064	0.0236566	0.00073299	0.0252606	0.000169656
													63	0.0233219	0.000554686	0.0248443	0.000632803	0.0240831	0.000839265	0.620155	0.0335979	0.0214341	0.000563074	0.0203824	0.000108068	0.0209082	0.000560335	0.526381	0.0275089	0.0168518	0.000558755	0.016146	0.000282627	0.0164989	0.000618608	0.360762	0.0153248	0.0193091	0.00113116	0.0180831	0.000941123	0.0186961	0.00146505	0.428176	0.0395796	0.0225599	0.000575174	0.0223627	0.000635917
	2000 nM MTX
	Biol Rep 1		Biol Rep 2		Mean of 2 biol reps																										For day 63
	GFP/total protein, %	SD	GFP/total protein, %	SD	GFP/total protein, %	SD geom	P-value vs Tr2 (unpaired t-test)																								Plasmid ID	% from initial	SD	P-value vs Tr2 (unpaired t-test)
p1.1	0.0323885	0.000164861	0.0326284	0.000973993	0.0325085	0.00098442	0.0385																								Tr1	0.620155	0.0335979	0.0925
p1.1-D	0.0386351	0.00186619	0.0362823	0.000183445	0.0374587	0.00181925	0.3461																								Tr2	0.526381	0.0275089
p1.1-Tr1	0.0391905	0.00121614	0.0384774	0.00105916	0.038834	0.00161087	0.6499																								Tr3	0.360762	0.0153248	0.0176
p1.1-Tr2	0.0414052	0.00154993	0.0380361	0.000940713	0.0397207	0.00178209																									Tr2(-)EBVTR	0.428176	0.0395796	0.1023
p1.1-Tr3	0.0488424	0.000966736	0.0426246	0.000112054	0.0457335	0.000913151	0.0519																								D	0.599628	0.0370481	0.1538
																															p1.1	0.480223	0.0220425	0.2047
																															Day-to-day Tr2 vs Tr3
																																p1.1-Tr2		p1.1-Tr3
	Amplification rate (eGFP expression increase, times)																														Day	% from initial	SD	% from initial	SD	P-value (unpaired t-test)
	eGFP increase, times	SD	P-value vs Tr2 (unpaired t-test)																												27	0.598104	0.0283461	0.450651	0.0152055	0.0229
p1.1	6.06283	0.33428	0.7499																												36	0.586603	0.0358676	0.460962	0.0103199	0.0415
p1.1-D	4.45176	0.258826	0.0451																												45	0.571469	0.0278697	0.40837	0.0130338	0.0173
p1.1-Tr1	5.5422	0.371009	0.4076																												54	0.627223	0.0289626	0.407184	0.0166695	0.0114
p1.1-Tr2	5.92759	0.380895																													63	0.526381	0.0275089	0.360762	0.0153248	0.0176
p1.1-Tr3	6.80722	0.368163	0.1435
[truncated: 12 more columns]
