# Supplementary material for: Promoter from Chinese hamster elongation factor-1a gene and Epstein-Barr virus terminal repeats concatemer fragment maintain stable high-level expression of recombinant proteins
Source: PeerJ. 2023 Oct 24;11:e16287. doi: 10.7717/peerj.16287 (PMC10607201; doi:10.7717/peerj.16287)
Supplement: Supplemental Information 4 [file peerj-11-16287-s004.xlsx]

## Sheet: deletions vs p11
										1667		y=((SQ, copies in 5 mkl)*1 genome)/1667 genomes
		MTX conc, nM	Plasmid ID	eGFP					DHFR					Rab					eGFP/Rab		DHFR/Rab
				SQ, copies in 5 mkl	SD	SQ, copies/genome	SD	%RSD	SQ, copies in 5 mkl	SD	SQ, copies/genome	SD	%RSD	SQ, copies in 5 mkl	SD	SQ, copies/genome	SD	%RSD	Ratio	SD together	Ratio	SD together
		200	p1.1	32300	6730	19.3761	4.03719	0.208359	19300	1620	11.5777	0.971806	0.0839378	1420	166	0.85183	0.0995801	0.116901	22.7465	5.43443	13.5915	1.95603
		200	p1.1-D	21400	2800	12.8374	1.67966	0.130841	12900	1400	7.73845	0.839832	0.108527	1250	214	0.74985	0.128374	0.1712	17.12	3.68891	10.32	2.09187
		200	p1.1-Tr1	16700	1720	10.018	1.03179	0.102994	7100	1600	4.25915	0.959808	0.225352	1280	75.5	0.767846	0.0452909	0.0589844	13.0469	1.54851	5.54687	1.29211
		200	p1.1-Tr2	15900	1090	9.53809	0.653869	0.0685535	6020	915	3.61128	0.54889	0.151993	1200	106	0.719856	0.0635873	0.0883333	13.25	1.48153	5.01667	0.881917
		200	p1.1-Tr3	17600	2060	10.5579	1.23575	0.117045	7670	159	4.60108	0.0953809	0.0207301	1330	99.9	0.79784	0.059928	0.0751128	13.2331	1.84038	5.76692	0.449363
		2000	p1.1	76600	13700	45.9508	8.21836	0.178851	37600	7720	22.5555	4.63107	0.205319	1300	128	0.779844	0.0767846	0.0984615	58.9231	12.0299	28.9231	6.586
		2000	p1.1-D	90300	6370	54.1692	3.82124	0.0705426	48000	6020	28.7942	3.61128	0.125417	2490	196	1.4937	0.117576	0.0787149	36.2651	3.83318	19.2771	2.8544
		2000	p1.1-Tr1	86700	2400	52.0096	1.43971	0.0276817	30800	8930	18.4763	5.35693	0.289935	1960	408	1.17576	0.244751	0.208163	44.2347	9.2891	15.7143	5.6088
		2000	p1.1-Tr2	38500	6370	23.0954	3.82124	0.165455	84300	15500	50.5699	9.29814	0.183867	1360	140	0.815837	0.0839832	0.102941	28.3088	5.51638	61.9853	13.0617
		2000	p1.1-Tr3	68600	9680	41.1518	5.80684	0.141108	32300	2410	19.3761	1.44571	0.074613	1300	145	0.779844	0.0869826	0.111538	52.7692	9.49146	24.8462	3.3342
		0	p1.1	60700	13000	36.4127	7.79844	0.214168	79900	15400	47.9304	9.23815	0.192741	2830	659	1.69766	0.395321	0.232862	21.4488	6.78584	28.2332	8.53437
		0	p1.1-D	22700	3470	13.6173	2.08158	0.152863	22200	3120	13.3173	1.87163	0.140541	1850	32.6	1.10978	0.0195561	0.0176216	12.2703	1.8881	12	1.69969
		0	p1.1-Tr1	31100	3060	18.6563	1.83563	0.0983923	29900	4530	17.9364	2.71746	0.151505	1700	54.9	1.0198	0.0329334	0.0322941	18.2941	1.89448	17.5882	2.72457
		0	p1.1-Tr2	40000	3330	23.9952	1.9976	0.08325	52900	8670	31.7337	5.20096	0.163894	2290	124	1.37373	0.0743851	0.0541485	17.4672	1.73469	23.1004	3.98731
		0	p1.1-Tr3	48200	2690	28.9142	1.61368	0.0558091	27800	10500	16.6767	6.29874	0.377698	1190	71.4	0.713857	0.0428314	0.06	40.5042	3.31904	23.3613	8.93417
