# Supplementary material for: Promoter from Chinese hamster elongation factor-1a gene and Epstein-Barr virus terminal repeats concatemer fragment maintain stable high-level expression of recombinant proteins
Source: PeerJ. 2023 Oct 24;11:e16287. doi: 10.7717/peerj.16287 (PMC10607201; doi:10.7717/peerj.16287)
Supplement: Supplemental Information 6 [file peerj-11-16287-s006.xlsx]

## Sheet: Tr2 vs Tr2(-)EBV
										1667		y=((SQ, copies in 5 mkl)*1 genome)/1667 genomes
		MTX conc, nM	Plasmid ID	eGFP					DHFR					Rab					eGFP/Rab		DHFR/Rab
				SQ, copies in 5 mkl	SD	SQ, copies/genome	SD	%RSD	SQ, copies in 5 mkl	SD	SQ, copies/genome	SD	%RSD	SQ, copies in 5 mkl	SD	SQ, copies/genome	SD	%RSD	Ratio	SD together	Ratio	SD together
		200	p1.1-Tr2	15900	1090	9.53809	0.653869	0.0685535	6020	915	3.61128	0.54889	0.151993	1200	106	0.719856	0.0635873	0.0883333	13.25	1.48153	5.01667	0.881917
		200	p1.1-Tr2(-)EBV	27400	3800	16.4367	2.27954	0.138686	15700	204	9.41812	0.122376	0.0129936	1820	145	1.09178	0.0869826	0.0796703	15.0549	2.40791	8.62637	0.696346
		2000	p1.1-Tr2	38500	6370	23.0954	3.82124	0.165455	84300	15500	50.5699	9.29814	0.183867	1360	140	0.815837	0.0839832	0.102941	28.3088	5.51638	61.9853	13.0617
		2000	p1.1-Tr2(-)EBV	144000	5820	86.3827	3.4913	0.0404167	49500	17000	29.6941	10.198	0.343434	1290	187	0.773845	0.112178	0.144961	111.628	16.7989	38.3721	14.3041
		0	p1.1-Tr2	40000	3330	23.9952	1.9976	0.08325	52900	8670	31.7337	5.20096	0.163894	2290	124	1.37373	0.0743851	0.0541485	17.4672	1.73469	23.1004	3.98731
		0	p1.1-Tr2(-)EBV	47300	5650	28.3743	3.38932	0.11945	55200	7140	33.1134	4.28314	0.129348	2040	246	1.22376	0.14757	0.120588	23.1863	3.93552	27.0588	4.78508
