# Supplementary material for: Promoter from Chinese hamster elongation factor-1a gene and Epstein-Barr virus terminal repeats concatemer fragment maintain stable high-level expression of recombinant proteins
Source: PeerJ. 2023 Oct 24;11:e16287. doi: 10.7717/peerj.16287 (PMC10607201; doi:10.7717/peerj.16287)
Supplement: Supplemental Information 7 [file peerj-11-16287-s007.xlsx]

## Sheet: Diagram pOV+-EBV
													pOV 2000 nM stability								pOV(+)EBVTR 2000 nM stability								p1.1-Tr2 2000 nM stability
	200 nM MTX											Days in culture w/o MTX	pOV								pOV(+)EBV								p1.1-Tr2
	Biol Rep 1		Biol Rep 2		Mean of 2 biol reps								Biol Rep 1		Biol Rep 2		Mean of 2 biol reps				Biol Rep 1		Biol Rep 2		Mean of 2 biol reps				Biol Rep 1		Biol Rep 2		Mean of 2 biol reps
	GFP/total protein, %	SD	GFP/total protein, %	SD	GFP/total protein, %	SD geom	P-value vs Tr2 (unpaired t-test)						GFP/total protein, %	SD	GFP/total protein, %	SD	GFP/total protein, %	SD	% from initial	SD	GFP/total protein, %	SD	GFP/total protein, %	SD	GFP/total protein, %	SD	% from initial	SD	GFP/total protein, %	SD	GFP/total protein, %	SD	GFP/total protein, %	SD	% from initial	SD
pOV	0.00408514	7.35141e-05	0.00374872	0.000191368	0.00391693	0.000212015	0.0218					0	0.030282	0.000610431	0.0552762	0.00131721	0.0427791	0.00133523	1	0.0441408	0.0284684	0.000415383	0.0501767	0.000852569	0.0393226	0.000880688	1	0.0316734	0.0230368	0.000414983	0.0372236	0.000144184	0.0301302	0.000555168	1	0.0260578
pOV(+)EBV	0.00473889	0.000121643	0.00486848	0.000157088	0.00480368	0.000198062	0.0883					12	0.019857	0.000226087	0.0200774	0.000249943	0.0199672	0.000336856	0.466752	0.0165603	0.0241684	0.000579931	0.0245136	0.000570643	0.024341	0.00081376	0.61901	0.0249091	0.0284548	0.000962558	0.0297738	0.00135089	0.0291143	0.0016477	0.966281	0.0575113
p1.1-Tr2	0.00544396	5.431e-06	0.0058174	0.000285206	0.00563068	0.000276109						27	0.0122975	0.000112392	0.0148961	0.000313028	0.0135968	0.000311578	0.317838	0.012307	0.0163471	0.000285989	0.0183951	0.000448176	0.0173711	0.000521036	0.441759	0.0165366	0.0234546	0.000149558	0.0250274	0.000511315	0.024241	0.00051881	0.80454	0.0227211
												34	0.0133181	4.436e-05	0.0118983	0.000201943	0.0126082	0.000218074	0.294728	0.0105172	0.018126	0.000167181	0.0195982	0.000622764	0.0188621	0.000624111	0.479677	0.0191656	0.0188224	0.00108067	0.019024	0.00018846	0.0189232	0.00110252	0.628046	0.0383779
	2000 nM MTX											41	0.0144418	3.0161e-05	0.0135839	0.000118246	0.0140129	0.000125442	0.327563	0.0106362	0.0210195	0.000922642	0.0188692	0.00027151	0.0199443	0.000921286	0.507198	0.0260375	0.019922	0.000547481	0.0209038	0.000465113	0.0204129	0.000721788	0.677488	0.027013
	Biol Rep 1		Biol Rep 2		Mean of 2 biol reps							47	0.00721622	0.000169546	0.00721189	0.000145724	0.00721405	0.000223555	0.168635	0.0074171	0.0124403	0.000515088	0.0133857	0.000256336	0.012913	0.000589077	0.328385	0.0166886	0.0203502	0.000759937	0.0198778	0.000379925	0.020114	0.000843783	0.66757	0.0305868
	GFP/total protein, %	SD	GFP/total protein, %	SD	GFP/total protein, %	SD geom	P-value vs Tr2 (unpaired t-test)					54	0.00823249	0.000207327	0.00783315	0.000294543	0.00803282	0.000363537	0.187775	0.0103231	0.0134391	0.000489619	0.0122471	0.000258474	0.0128431	0.000540744	0.326609	0.015576	0.0183297	0.000488263	0.0172345	0.000206904	0.0177821	0.00051956	0.590174	0.0203863
pOV	0.0552762	0.00131721	0.0545652	0.00149646	0.0549207	0.00199536	0.0107					61	0.0100091	9.45024e-05	0.00909432	0.000362234	0.00955172	0.000390995	0.22328	0.0114937	0.0137544	0.000346347	0.0134441	0.000228198	0.0135993	0.000412975	0.345839	0.0130496	0.0149649	0.000213069	0.0155978	0.000293764	0.0152814	0.000360791	0.507178	0.0151894
pOV(+)EBV	0.0501767	0.000852569	0.0484226	0.00159144	0.0492996	0.00182399	0.0194					68	0.00786054	4.35507e-05	0.00629238	0.000322916	0.00707646	0.000365264	0.165419	0.00997806	0.0133791	0.000321472	0.0140605	0.00025121	0.0137198	0.000410804	0.348905	0.0130462	0.0149786	6.63665e-05	0.0144331	0.000307331	0.0147059	0.000319846	0.488078	0.0139127
p1.1-Tr2	0.0372236	0.000144184	0.0351632	0.00185414	0.0361934	0.00191361
																	For day 68
																	Plasmid ID		% from initial	SD	P-value vs Tr2 (unpaired t-test)
	Amplification rate (eGFP expression increase, times)																pOV		0.165419	0.00997806	0.0014
	eGFP increase, times	SD	P-value vs Tr2 (unpaired t-test)														pOV(+)EBV		0.348905	0.0130462	0.0092
pOV	14.0214	0.914061	0.0089														p1.1-Tr2		0.488078	0.0139127
pOV(+)EBV	10.2629	0.568538	0.0178
p1.1-Tr2	6.42789	0.463522
