# Supplementary material for: Promoter from Chinese hamster elongation factor-1a gene and Epstein-Barr virus terminal repeats concatemer fragment maintain stable high-level expression of recombinant proteins
Source: PeerJ. 2023 Oct 24;11:e16287. doi: 10.7717/peerj.16287 (PMC10607201; doi:10.7717/peerj.16287)
Supplement: Supplemental Information 8 [file peerj-11-16287-s008.xlsx]

## Sheet: pOVs vs Tr2 GFP DHFR together
										1667		y=((SQ, copies in 5 mkl)*1 genome)/1667 genomes
		MTX conc, nM	Plasmid ID	eGFP					DHFR					Rab					eGFP/Rab		DHFR/Rab
				SQ, copies in 5 mkl	SD	SQ, copies/genome	SD	%RSD	SQ, copies in 5 mkl	SD	SQ, copies/genome	SD	%RSD	SQ, copies in 5 mkl	SD	SQ, copies/genome	SD	%RSD	Ratio	SD together	Ratio	SD together
		200	pOV	39900	1720	23.9352	1.03179	0.0431078	25500	4680	15.2969	2.80744	0.183529	1950	395	1.16977	0.236953	0.202564	20.4615	4.23759	13.0769	3.57446
		200	pOV(+)EBV	24000	1870	14.3971	1.12178	0.0779167	10700	1050	6.41872	0.629874	0.0981308	1490	91.5	0.893821	0.054889	0.0614094	16.1074	1.59797	7.18121	0.831309
		200	p1.1-Tr2	20100	4190	12.0576	2.5135	0.208458	12100	2090	7.25855	1.25375	0.172727	2920	227	1.75165	0.136173	0.0777397	6.88356	1.53147	4.14384	0.784906
		2000	pOV	314000	70000	188.362	41.9916	0.22293	144000	6080	86.3827	3.64727	0.0422222	4130	441	2.4775	0.264547	0.10678	76.0291	18.7931	34.8668	4.00356
		2000	pOV(+)EBV	142000	3630	85.183	2.17756	0.0255634	67100	3280	40.2519	1.96761	0.0488823	4350	302	2.60948	0.181164	0.0694253	32.6437	2.41505	15.4253	1.30973
		2000	p1.1-Tr2	111000	24100	66.5867	14.4571	0.217117	106000	9260	63.5873	5.55489	0.0873585	5190	440	3.11338	0.263947	0.0847784	21.3873	4.98499	20.4239	2.48626
		0	pOV	186000	32100	111.578	19.2561	0.172581	125000	28800	74.985	17.2765	0.2304	4440	633	2.66347	0.379724	0.142568	41.8919	9.37757	28.1532	7.62788
		0	pOV(+)EBV	53500	12300	32.0936	7.37852	0.229907	29600	5870	17.7564	3.5213	0.198311	3200	56.3	1.91962	0.0337732	0.0175937	16.7187	3.85499	9.25	1.84158
		0	p1.1-Tr2	11900	2780	7.13857	1.66767	0.233613	16400	4700	9.83803	2.81944	0.286585	2650	36.6	1.58968	0.0219556	0.0138113	4.49057	1.05089	6.18868	1.77564
